# Supplementary material for: Organization and Unconventional Integration of the Mating-Type Loci in Morchella Species
Source: J Fungi (Basel). 2022 Jul 19;8(7):746. doi: 10.3390/jof8070746 (PMC9318749; doi:10.3390/jof8070746)
Supplement: Supplementary file 1 [file jof-08-00746-s001.zip › Suplplementary table.xlsx]

## Sheet: Sheet1
Supplementary Table 1 Primer sequences used in this study
Code	Specified use	Sequences (5'-3')
p11-1f	Complete mating idiomorphs of black and yellow morels	ACGGCTTGATGGACTTGTATTGCTTG
p11-2r		GAGATGCGACAACAGACATTGGGCT
p11-2f	SDH2 to MAT1-1-1 of M. rufobrunnea	ATGTATGTGTGGGGGAGCGGGTAGA
p1-3r		TGTGGAGAAACAGGGAAAACTAAAC
p1-4f	MAT1-2-1 to MBA1 of M. rufobrunnea	TTTATTCTTATCCCCCCGCCAACAC
p2-3r		CGACAACAGACATTGGGCTACTTAC
p11-4f	Complete MAT locus of M. rufobrunnea	TTCATAGCACAACTTCCGCAAATAC
p11-4r		GAATCCTGACCTCTGTTTTGTAGCA
p4-3f	Coding regions of the MAT1-2-1 gene of yellow morels	GACTACGATCGAATAATGGCTCCGC
p4-3r		CGGTCTTAGCTTCGTCGACTTTAGT
p5-3f	Coding regions of the MAT1-1-1 gene of yellow morels	ATGTCACTTCGCCCGGTTTATC
p5-3r		CATCGCAATGTCGTGTGTTCTT
p10-1f	Coding regions of the MAT1-2-1 gene of black morels	GGCCAGAACAGATGCTCGAAGAAGC
p10-5r		GTGGCAACTCCCAAAGCATGATCAA
p7-2f	Coding regions of the MAT1-1-1 gene of black morels	CCGGTTTATCTTACTGGACTGGTTC
p8-5r		TGGAATGTCTGTGATTGAGGCTGTG
p1-5f	Coding regions of the MAT1-2-1 gene of M. rufobrunnea	ATCAACCAAACCTTTGCCCATT
p1-5r		CGATCCTCAGTACCGTCGTCCT
p1-6f	Coding regions of the MAT1-1-1 gene of M. rufobrunnea	ATGTCACTCCGCCCAGTTTATC
p1-6r		CTCCGAAAACTGGATTCCCTGC
p17-1f	Coding regions of the MAT1-1-10 gene of M. sextelata	TCGTGTCCCTAAAATACCTCCCCTC
p17-1r		GCTCTAATCTGCGTCCTGTTTCCTT
p17-3f	Coding regions of the MAT1-1-10 gene of M. eximia	TTCAGATGCCAACACAAGGACTAGT
p17-2r		CGTGACGGATTAGACCATACTTT
p18-1f	Coding regions of the MAT1-1-10 gene of M. purpurascens and M. pulchella	ACCCTCCAACTTCAGATGCCAACAC
p18-1r		AGGTATTCCACCAATTCGACTAACG
p16-4f	Coding regions of the MAT1-1-10 gene of yellow morels	ACGGAATTTTGTTTCCACTCCATGA
p16-4r		GATGAGAGATTCCACCGCCTCTAGC
p16-5f	Coding regions of the MAT1-1-10 gene of M. rufobrunnea	TTAAATGCTCTATGAAACTGGCACA
p16-5f		ATCTTACGAATGGAACTAAGACCAG
p19-2f	Coding regions of the MAT1-1-11 gene of M. sextelata	TCGGGATTATCTCTCTGGAGTTTAG
p19-2r		GACGACAACCCTCACTGAAAATACG
p19-3f	Coding regions of the MAT1-1-11 gene of M. eximia	GTATTTTACTCAAACCGAAACACAT
p19-3r		TGACTGCTCATCTACAAAAGTTCCT
p20-2f	Coding regions of the MAT1-1-11 gene in the MAT1-2 idiomorph of M. purpurascens and M. pulchella	CCAATCATCCAGTTACTTTTCACGA
p20-2r		CGAATAACATGGATGGGGCTAACTG
p20-1f	Coding regions of the MAT1-1-11 gene in the MAT1-1 idiomorph of M. purpurascens and M. pulchella	CATGGATACACCCTGACAATTACGA
p20-1r		AGGTGCAGTGACACGGCAATCTACA
p20-3r		TGACCATTGACACTTCGCAACTCTC
p20-4r		ACTCTATACGATCTGATCTGGGTTC
